# Supplementary material
Source: publisher figshare collection journal article supplement (https://karger.figshare.com/ndownloader/files/12726140)
Supplement: Supplementary file 1 [file 12726140]

Supplementary Table 1. Content of the NCGENES Telephone Surveys

| Constructs | Survey 1 | Survey 2 |
| --- | --- | --- |
| Health-related quality of life | X | X |
| Healthcare utilization | X | X |
| Current diet and PA | X | X |
| Smoking | X | X |
| Medications/supplement use | X | X |
| Beliefs/expectations about illness prompting WES | X | X |
| Illness uncertainty | X | X |
| Expectations regarding WES diagnostic testing | X | X |
| Decision regret about agreeing to diagnostic WES | X | X |
| Information seeking and sources of info | X | X |
| Health Distress | X | X |
| General Distress | X | X |
| Attitudes/beliefs about genetic research | X |  |
| Understanding of diagnostic results |  | X |
| Test-specific distress |  | X |
| Adaptation to genetic concern |  | X |
| Information sharing |  | X |
| Prevention/planning behaviors |  | X |

Supplementary Table 2: Adult patients nominated for the NCGENES study (N=774) and either approached for recruitment (N=724) or not approached (N= 50)

|  | Nominated | Not Approached | Approached | *p* value |
| --- | --- | --- | --- | --- |
| Ethnicity |  |  |  |  |
| Hispanic or Latino | 35 | 0 (0%) | 35 (100%) | 0.159 |
| NOT Hispanic or Latino | 702 | 46 (7%) | 656 (93%) |  |
| Missing ethnicity data | 37 | 4 | 33 |  |
| Race |  |  |  |  |
| White | 519 | 37 (7%) | 482 (93%) | 0.581 |
| African American | 213 | 11 (5%) | 202 (95%) |  |
| Other | 39 | 2 (5%) | 37 (95%) |  |
| Missing race data | 3 | 0 | 3 |  |
| Age, mean (SD) | 45.1 (14.8) | 40.6 (14.2) | 45.5 (14.8) | 0.026 |
| Sex |  |  |  |  |
| Female | 531 | 29 (6%) | 502 (95%) | 0.114 |
| Male | 243 | 21 (9%) | 222 (91%) |  |

Supplementary Table 3: Caregivers of children or cognitively impaired adult patients nominated for the NCGENES study (N=373) and either approached for recruitment (N=341) or not approached (N=32)

|  | Nominated | Not Approached | Approached | *p* value |
| --- | --- | --- | --- | --- |
| Patient’s Ethnicity |  |  |  |  |
| Hispanic or Latino | 61 | 2 (3%) | 59 (97%) | 0.134 |
| NOT Hispanic or Latino | 306 | 30 (10%) | 276 (90%) |  |
| Missing ethnicity data | 6 | 0 | 6 |  |
| Patient’s Race |  |  |  |  |
| White | 288 | 28 (10%) | 260 (90%) | 0.311 |
| African American | 56 | 2 (4%) | 54 (96%) |  |
| Other | 28 | 2 (7%) | 26 (93%) |  |
| Missing race data | 1 | 0 | 1 |  |
| Patient’s Sex |  |  |  |  |
| Female | 180 | 17 (9%) | 163 (91%) | 0.584 |
| Male | 193 | 15 (8%) | 178 (92%) |  |
